# Supplementary material for: Heterogeneity in Mitogen-Activated Protein Kinase (MAPK) Pathway Activation in Uveal Melanoma With Somatic GNAQ and GNA11 Mutations
Source: PubMed Central journal article supplement (PMC6557618; doi:10.1167/iovs.18-26452), 2019-06
Supplement: iovs-60-06-18_s01.pdf [file iovs-60-06-18_s01.pdf]

Supplement Table 1. PCR primers used for restriction fragment polymorphism and sequencing

| Gene    | Exon | Codon | Transcript   | Forward Primer<br>5'→3'           | Reverse Primer<br>5'→3'           | Product<br>size (bp) |
|---------|------|-------|--------------|-----------------------------------|-----------------------------------|----------------------|
| GNAQ    | 4    | 183   | NM_002072.2  | TGGTGTGATGGTGTCACTGA<br>CATTCTCAT | AGCTGGGAAATAGGTTTCATGG<br>ACTCAGT | 212                  |
| GNAQ    | 5    | 209   | NM_002072.2  | TTTTCCCTAAGTTTGTAAGTA<br>GTGC     | CCCACACCCTACTTTCTATCAT<br>TTAC    | 298                  |
| GNA11   | 4    | 183   | NM_002067    | GTGCTGTGCCCTGTCCTG                | GGCAAATGAGCCTCTCAGTG              | 249                  |
| GNA11   | 5    | 209   | NM_002067    | GGTGGGAGCCGTCCTGGGAT              | GGCAGAGGGAATCAGAGGGGC             | 344                  |
| PLCB4   | 20   | 630   | NM_000933    | TGAGTCGCATTTACCCCAAG              | AACTGATGGGAAGTGCTGGC              | 184                  |
| CYSLTR2 | 1    | 129   | NM_001308471 | TCATAAGCACGCTTCCCTTCA             | ATTGCCAGGAAACGCACAAC              | 160                  |
