# Supplementary material for: Heterogeneity in Mitogen-Activated Protein Kinase (MAPK) Pathway Activation in Uveal Melanoma With Somatic GNAQ and GNA11 Mutations
Source: PubMed Central journal article supplement (PMC6557618; doi:10.1167/iovs.18-26452), 2019-06
Supplement: iovs-60-06-18_s02.pdf [file iovs-60-06-18_s02.pdf]

Supplement Table 2. Enzymes and product sizes for restriction fragment length polymorphism assay

| Gene                  | Enzyme   | PCR product | RFLP band size in base pairs |                       |                     |
|-----------------------|----------|-------------|------------------------------|-----------------------|---------------------|
|                       |          |             | WT                           | Heterozygous Mutation | Homozygous Mutation |
| GNAQ <sup>R183</sup>  | TaqI     | 212         | 141, 71, 23                  | 141, 118, 71, 23      | 118, 71, 23         |
| GNAQ <sup>Q209</sup>  | Eco0109I | 298         | 298                          | 292, 191, 107         | 191, 107            |
| GNA11 <sup>R183</sup> | BstUI    | 249         | 139, 110                     | 249, 139, 110         | 249                 |
| GNAQ <sup>Q209</sup>  | MspA1I   | 344         | 195, 98, 51                  | 293, 195, 98, 51      | 293, 51             |

RFLP: Restriction Fragment Length Polymorphism
