# Supplementary material for: Heterogeneity in Mitogen-Activated Protein Kinase (MAPK) Pathway Activation in Uveal Melanoma With Somatic GNAQ and GNA11 Mutations
Source: PubMed Central journal article supplement (PMC6557618; doi:10.1167/iovs.18-26452), 2019-06
Supplement: iovs-60-06-18_s03.pdf [file iovs-60-06-18_s03.pdf]

Supplement Table 3 Correlation between immunohistochemistry and Western blot analysis

| Sample | Tumor MHA | %     | Tumor CMC | %        | Average IHC | Western pERK |
|--------|-----------|-------|-----------|----------|-------------|--------------|
| UM9001 | 2         | 1     | 3         | <1       | 0           | 0            |
| UM8005 | 2         | 10    | 3         | <5       | 2           | 2            |
| UM0021 | 1         | 10    | 2         | 15       | 2           | 2            |
| UM7008 | 2         | 100   | 3         | >90      | 2           | 2            |
| UM6004 | 2         | 10    | 2-3       | 10       | 2           | 3            |
| UM7003 | 2         | 10    | 3         | 10       | 2           | 3            |
| UM8008 | 2         | 10    | 2 & 4     | <10 & <5 | 2           | 1            |
| UM8007 | 1         | 20    | 2         | 20       | 2           | 1            |
| UM8003 | 2         | 30    | 2         | 70       | 2           | 2            |
| UM0011 | 2         | 35    | 2, 3      | 10%, 20% | 2           | 3            |
| UM7004 | 2         | 40    | 3         | 90       | 2           | 2            |
| UM8002 | 2         | 50    | 2-4       | 60       | 2           | 1            |
| UM7017 | 2         | 40-50 | 2         | 60       | 2           | 2            |
| UM6002 | 2         | <5    | 1         | 5        | 1           | 2            |
